# Supplementary material for: Overview of Extensively Employed Polymeric Carriers in Solid Dispersion Technology
Source: PubMed Central journal article supplement (PMC7649155; doi:10.1208/s12249-020-01849-z), 2020-11-08
Supplement: 12249_2020_1849_MOESM1_ESM.pdf [file 12249_2020_1849_MOESM1_ESM.pdf]

## ***Overview of extensively employed polymeric carriers in Solid Dispersion Technology.***

*Athira R. Nair<sup>1</sup>, Yarlagadda Dani Lakshman<sup>1</sup>, Vullendula Sai Krishna Anand<sup>1</sup>,  
K S Navya Sree<sup>1</sup>, Krishnamurthy Bhat<sup>1</sup>, Swapnil J. Dengale<sup>1\*</sup>*

<sup>1</sup>Department of Pharmaceutical Quality Assurance, Manipal College of Pharmaceutical Sciences, Manipal Academy of Higher Education, Manipal-576 104.

**\*Corresponding Author:**

Dr. Swapnil J. Dengale.\*, Associate Professor, M. Pharm., Ph.D.,

Address: Manipal College of Pharmaceutical Sciences, Manipal Academy of Higher Education, Manipal -576 104, Karnataka, India.

E-mail- [swapnil.jd@manipal.edu](mailto:swapnil.jd@manipal.edu)

Telephone-+918202922482

Mobile- +91 9916311176

Fax- +918202571998

Table I: Various grades of PVP and relevant properties thereof.

| S. no | Polymer Grade | Viscosity mPas | Density (g/mol) <sup>a</sup> | Heat Capacity (J/gm.K) <sup>a</sup> |
|-------|---------------|----------------|------------------------------|-------------------------------------|
| 1     | PVP K-12      | 1.3 – 2.3      | 1.04                         | 0.37                                |
| 2     | PVP K-15      | 1.5 – 3.5      |                              |                                     |
| 3     | PVP K-30      | 5.5 – 8.5      | 1.12                         | 0.28                                |
| 4     | PVP K-60      | -              |                              |                                     |
| 5     | PVP K-90      | 300-700        | 1.21                         | 0.29                                |
| 6     | PVP K-120     | -              |                              |                                     |

Reference

a Knopp M et al., (2015) [69].

Table II: Various grades of pharmaceutically relevant HPMC and relevant properties thereof.

| SN | HPMC Grade <sup>a</sup> | % Methoxy       | % Hydroxypropoxy | % Moisture (%) <sup>b</sup> |
|----|-------------------------|-----------------|------------------|-----------------------------|
| 1  | HPMC E<br>(USP 2910)    | 28 – 30<br>(29) | 7 – 12<br>(8.5)  | 3.92                        |
| 2  | HPMC F<br>(USP 2906)    | 27 – 30<br>(28) | 4 – 7.5<br>(5.0) | 3.98                        |
| 3  | HPMC K<br>(USP 2208)    | 19 – 24<br>(22) | 7 – 12<br>(8.1)  | 4.73                        |

<sup>a</sup> Subtype of respective polymer is 4M representing molecular weight 4000 g/mol [126].<sup>b</sup> Moisture content measured by employing TGA analysis [43].

Values in the parentheses represent the USP limits.

Table III: Different grades of HPMCAS and its properties

| Properties             | HPMCAS Grade |          |          |
|------------------------|--------------|----------|----------|
|                        | L Grade      | M Grade  | H Grade  |
| Acetyl Content         | 5 – 9%       | 7 – 11%  | 10 – 14% |
| Succinoyl Content      | 14 – 18%     | 10 – 14% | 4 – 8%   |
| Methoxyl Content       | 20 – 24%     | 21 – 25% | 22 – 26% |
| Hydroxypropoxy Content | 5 – 9%       | 5 – 9%   | 6 – 10%  |

L, M, H grade: Different grades of HPMCAS; each grade is available in 2 different particle size: fine (F) and granular (G).

Reference: AquaSolve™ hypromellose acetate succinate (hydroxypropyl methylcellulose acetate succinate or HPMCAS). <https://www.ashland.com/industries/pharmaceutical/oral-solid-dose/aquasolve-hypromellose-acetate-succinate> (accessed Jun 14, 2020).

Table IV: List of marketed solid dispersion product containing PEG, PVP, HPMC and HPMCAS

| SN.           | Trade Name                 | API                                          | Polymer excipient                | Dosage form                        | Preparation techniques     | Year of launch | Manufactured by                |
|---------------|----------------------------|----------------------------------------------|----------------------------------|------------------------------------|----------------------------|----------------|--------------------------------|
| <b>PEG</b>    |                            |                                              |                                  |                                    |                            |                |                                |
| 1             | Gris-PEG®                  | Griseofulvin                                 | PEG                              | Tablet                             | Melt method                | 1975           | Pedinol<br>Pharmaceutical Inc. |
| <b>PVP</b>    |                            |                                              |                                  |                                    |                            |                |                                |
| 1             | Cesamet®                   | Nabilone                                     | PVP                              | Tablet                             | Solvent evaporation        | 1985           | Valeant                        |
| 2             | Kaletra®                   | Ritonavir/<br>Lopinavir                      | PVP-VA64                         | Tablet                             | HME                        | 2007           | Abbott                         |
| 3             | Norvir®                    | Ritonavir                                    | PVP-VA64                         | Tablet                             | HME                        | 2010           | Abbott                         |
| <b>HPMC</b>   |                            |                                              |                                  |                                    |                            |                |                                |
| 1             | Isoptin® ER-E              | Verapamil                                    | HPC/HPMC                         | Tablet                             | HME                        | 1982           | Abbott                         |
| 2             | Nivadil®                   | Nivaldipine                                  | HPMC                             | Tablet                             | HME                        | 1989           | Fujisawa                       |
| 3             | Sporanox®                  | Itraconazole                                 | HPMC                             | Capsule                            | Fluid-bed<br>bead layering | 1992           | Janssen                        |
| 4             | Prograf®                   | Tacrolimus                                   | HPMC                             | Capsule                            | Spray drying               | 1994           | Astellas<br>Pharma Inc.        |
| 5             | Rezulin®#                  | Troglitazone                                 | PVP/HPMC                         | Tablet                             | N/A                        | 1997           | Pfizer                         |
| 6             | Crestor®                   | Rosuvastatin                                 | HPMC                             | Tablet                             | Spray drying               | 2002           | Astra Zeneca                   |
| 7             | Zithromax®                 | Azithromycin                                 | HPMC                             | Tablet                             | HME                        | 2002           | Pfizer, Inc                    |
| 8             | Eucreas®                   | Vildagliptin +<br>Metformin<br>Hydrochloride | HPMC                             | Tablet                             | HME                        | 2007           | Novartis                       |
| 9             | Intelence®                 | Etravirine                                   | HPMC                             | Tablet                             | Spray drying               | 2008           | Janssen                        |
| 10            | Modigraf®                  | Tacrolimus                                   | HPMC                             | Granules<br>for oral<br>suspension | Spray drying               | 2009           | Astellas Pharma<br>Europe B.V. |
| 11            | Samsca®                    | Tolvaptan                                    | HPMC                             | Tablet                             | Granulation                | 2009           | Otsuka Pharma                  |
| 12            | Zortress®                  | Everolimus                                   | HPMC                             | Tablet                             | Spray drying               | 2010           | Novartis<br>Pharmaceuticals    |
| 13            | Onmel®                     | Itraconazole                                 | HPMC                             | Tablet                             | HME                        | 2010           | Stiefel                        |
| 14            | Certican®                  | Everolimus                                   | HPMC                             | Tablet                             | HME                        | 2012           | Novartis                       |
| 15            | Incivo®                    | Etravirine                                   | HPMC                             | Tablet                             | N/A                        | 2012           | Janssen                        |
| 16            | Astragraf XL®              | Tacrolimus                                   | HPMC                             | Capsule                            | Wet<br>granulation         | 2013           | Astellas<br>Pharma Inc.        |
| 17            | Isoptin-SRE®               | Verapamil                                    | HPC/HPMC                         | Tablet                             | HME                        | 2015           | AbbVie Inc.                    |
| 18            | Envarsus®<br>LCPTacrolimus | Tacrolimus                                   | Poloxamer/<br>HPMC               | Tablet                             | Melt dose<br>technology    | 2015           | Veloxis<br>Pharmaceuticals     |
| 19            | Zepatier®                  | Elbasvir/<br>Grazoprevir                     | TPGS,<br>Copovidone,<br>and HPMC | Tablet                             | Spray drying               | 2016           | Merck                          |
| 20            | LCP-Tacro®                 | Tacrolimus                                   | HPMC                             | Tablet                             | N/A                        | N/A            | LifeCycle Pharma               |
| <b>HPMCAS</b> |                            |                                              |                                  |                                    |                            |                |                                |
| 1             | Cymbalta®                  | Duloxetine                                   | HPMCAS                           | Capsule                            | N/A                        | 2004           | Eli Lilly                      |

Supplementary material

| SN. | Trade Name    | API                      | Polymer excipient | Dosage form | Preparation techniques           | Year of launch | Manufactured by        |
|-----|---------------|--------------------------|-------------------|-------------|----------------------------------|----------------|------------------------|
| 2   | Incivek®      | Telaprevir               | HPMCAS            | Tablet      | Spray drying                     | 2011           | Vertex Pharmaceuticals |
| 3   | Zelboraf®     | Vemurafenib              | HPMCAS            | Tablet      | Solvent controlled precipitation | 2011           | Roche                  |
| 4   | Kalydeco®     | Ivacaftor                | HPMCAS            | Tablet      | Spray drying                     | 2012           | Vertex Pharmaceuticals |
| 5   | Nofaxil®      | Posconazole              | HPMCAS/<br>HPC    | Tablet      | HME                              | 2013           | Merck                  |
| 6   | Orkambi®      | Lumacaftor/<br>Ivacaftor | HPMCAS/<br>SLS    | Tablet      | Spray drying                     | 2015           | Vertex Pharmaceuticals |
| 7   | Torcetrapib®# | Torcetrapib              | HPMCAS            | Tablet      | N/A                              | N/A            | Pfizer                 |

#product withdrawn from market.

HME: Hot Melt Extrusion

N/A: Not available

Reference: [88, 41], and Vasconcelos, T., Marques, S., Neves, J. D., & Sarmiento, B. (2016). Amorphous solid dispersions: Rational selection of a manufacturing process. *Advanced Drug Delivery Reviews*, 100, 85-101.

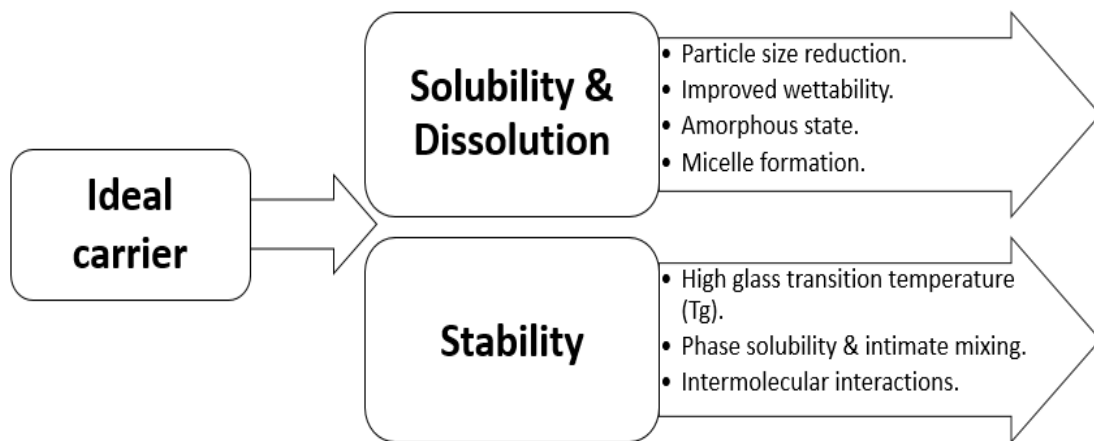

Figure 1: Characteristics of ideal carrier.

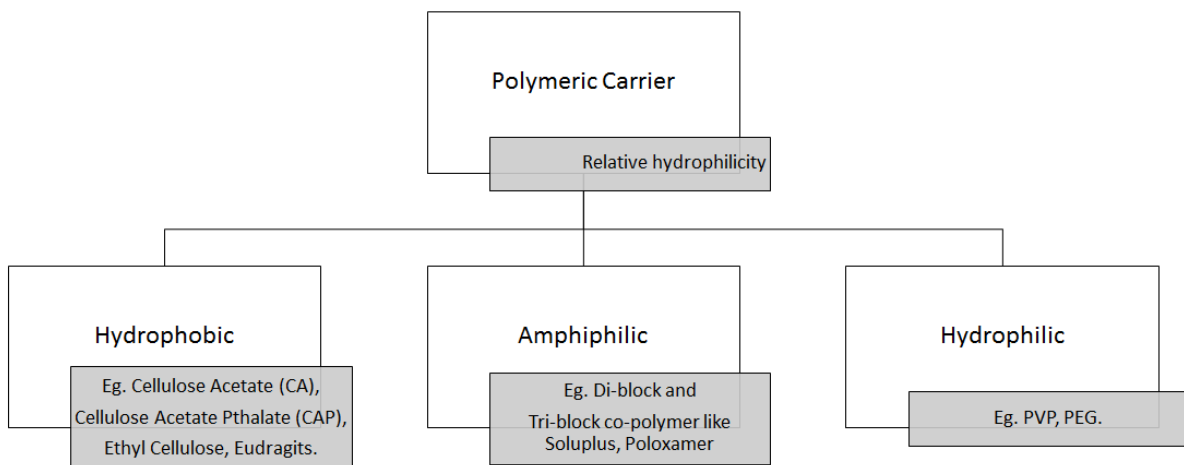

Figure 2: Classification of polymeric carriers based on relative hydrophilicity.

PVP – Polyvinyl Pyrrolidone

PEG – Polyethylene Glycol

HPMC – Hydroxy Propyl Methyl Cellulose

HPMCAS - Hydroxy Propyl Methyl Cellulose acetate succinate

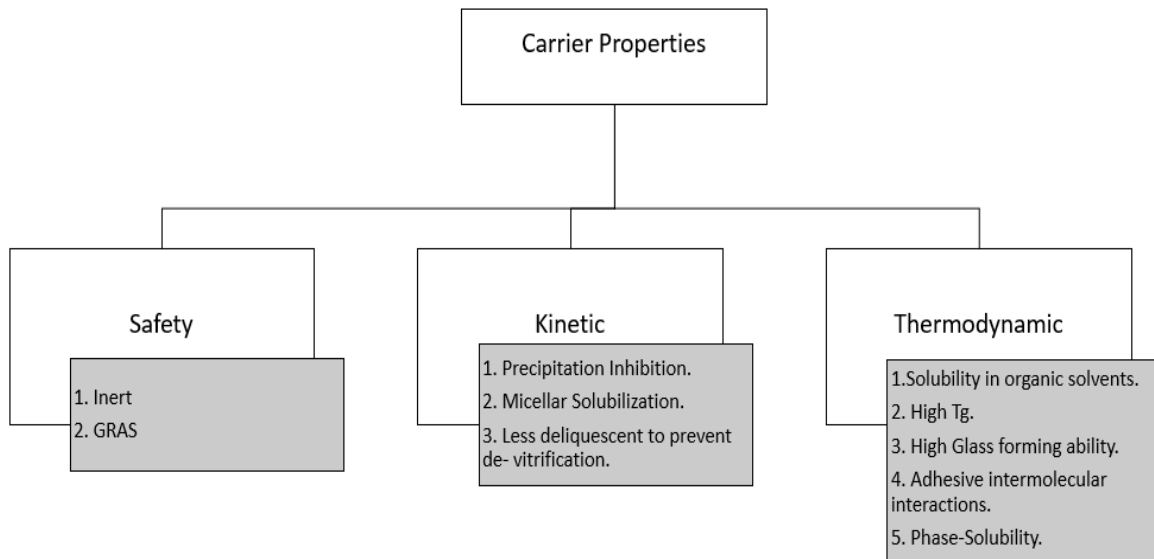

Figure 3: Classification based on carrier properties.

GRAS – Generally Regarded As Safe

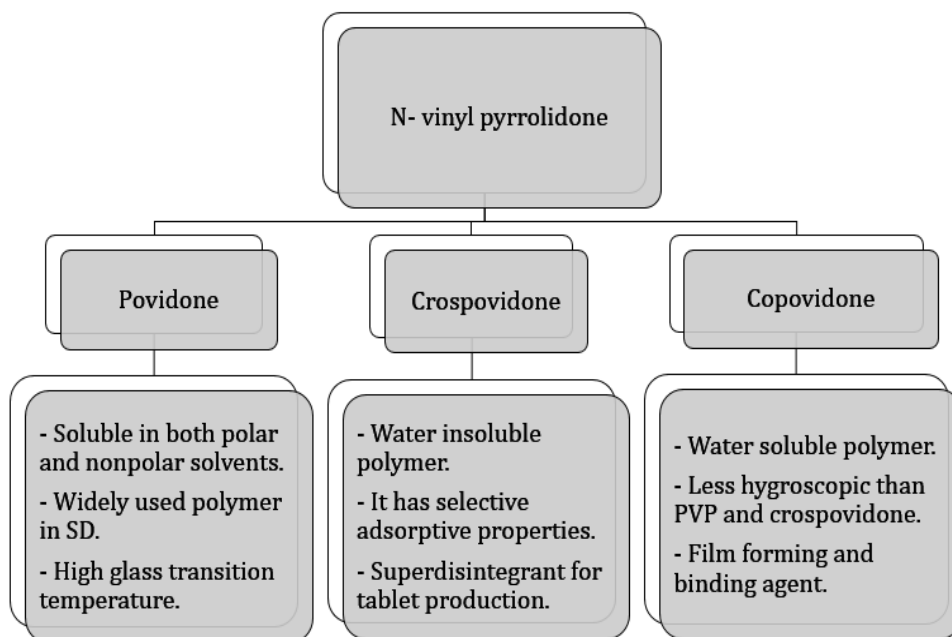

Figure 4: Classification of N- vinyl pyrrolidone based on crosslinking.

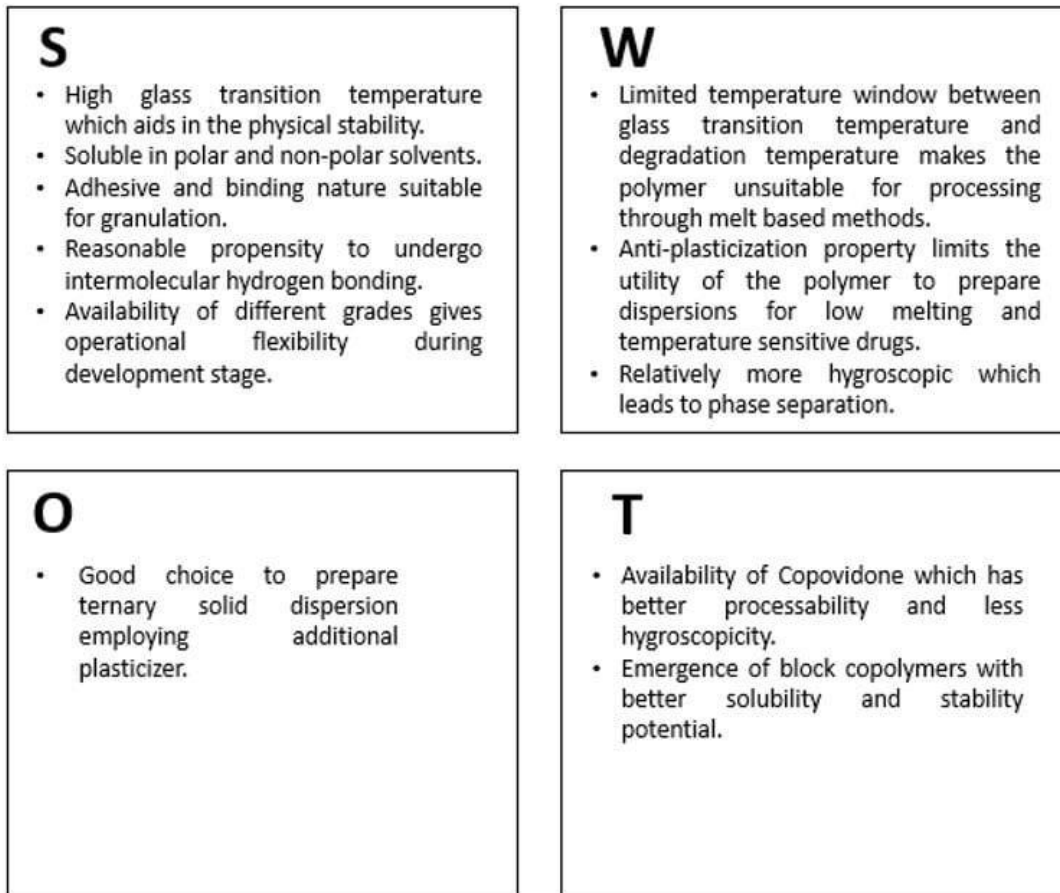

Figure 5: SWOT analysis of PVP with regard to its implementation in solid dispersions.

SWOT – strengths, weaknesses, opportunities, and threats

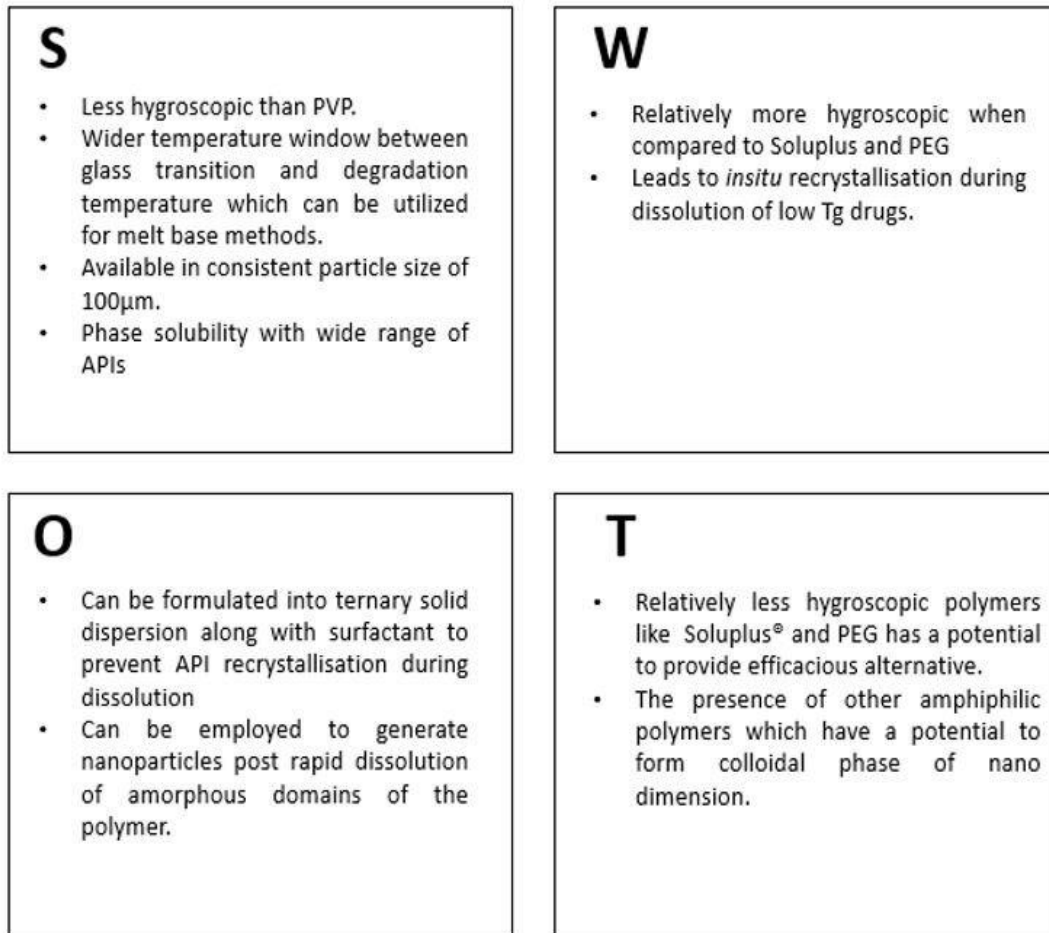

Figure 6: SWOT analysis of Copovidone with regard to its implementation in solid dispersions.

API – Active Pharmaceutical Ingredient



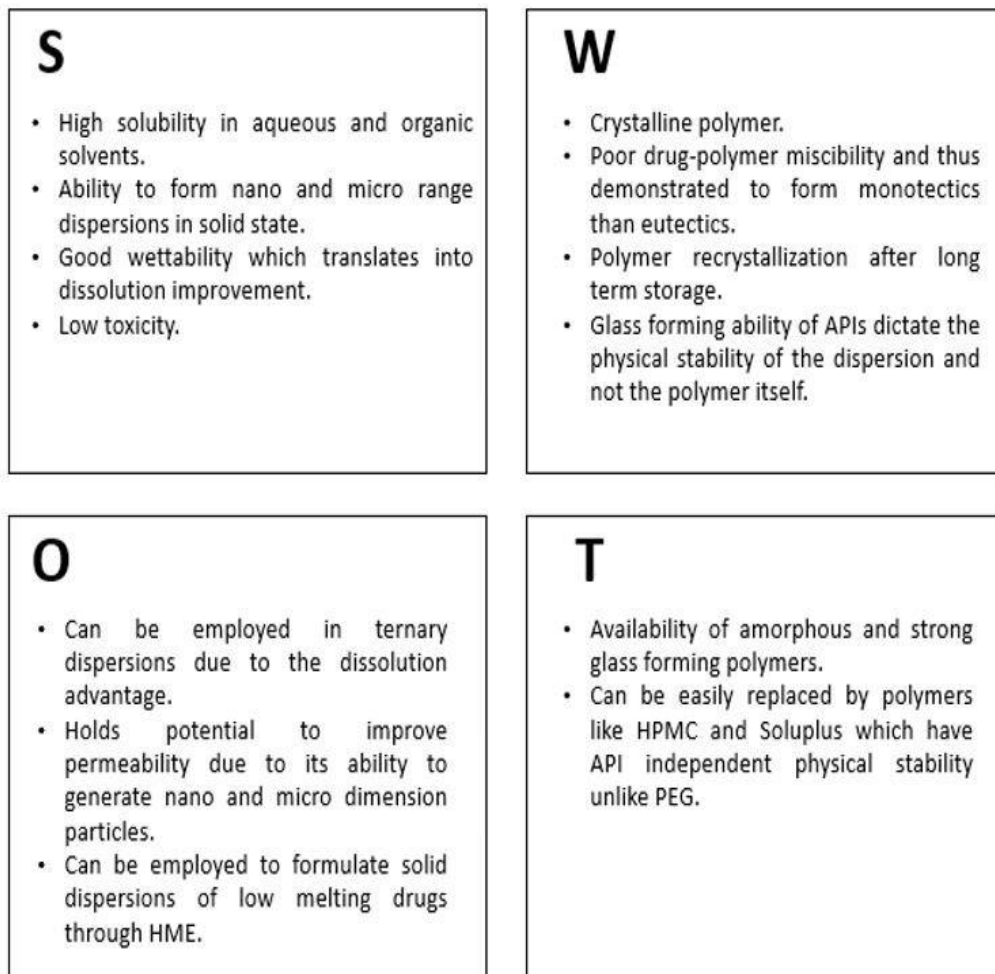

Figure 7: SWOT analysis of PEG with regard to its implementation in solid dispersions.

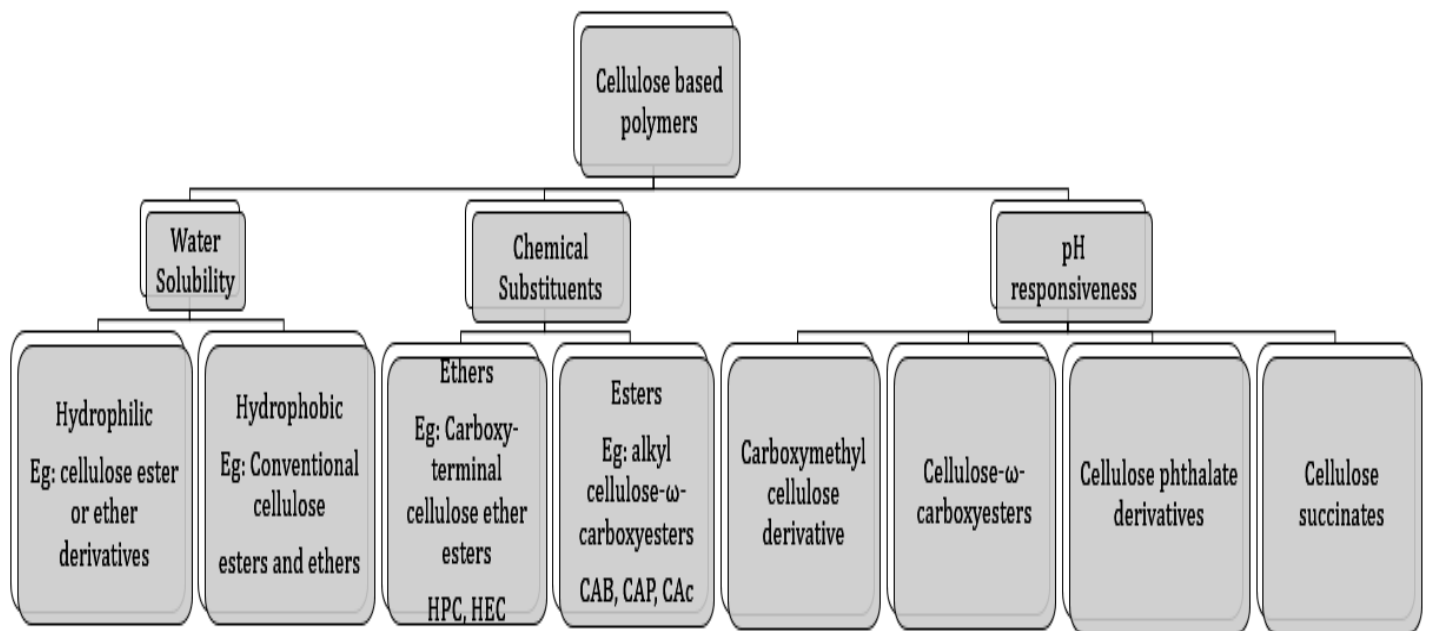

Figure 8: Classification of cellulose based polymer based on water solubility, chemical substituents and pH responsive behaviour. [Part of the classification is reproduced from reference 41]

HPC: Hydroxypropyl cellulose

HEC: Hydroxyethyl cellulose

CAC: Cellulose acetate

CAP: Cellulose acetate-propionate

CAB: Cellulose acetate-butyrate

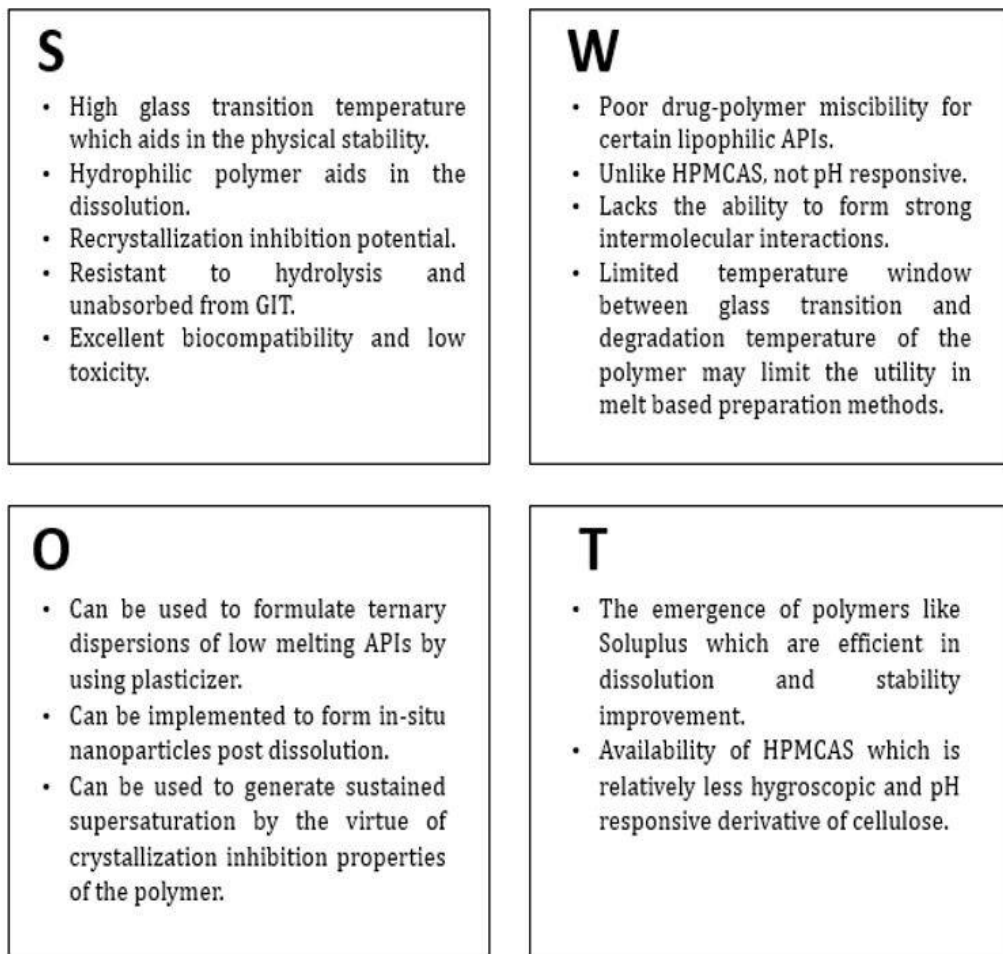

Figure 9: SWOT analysis of HPMC with regard to its implementation in solid dispersions.

GIT – Gastrointestinal Tract

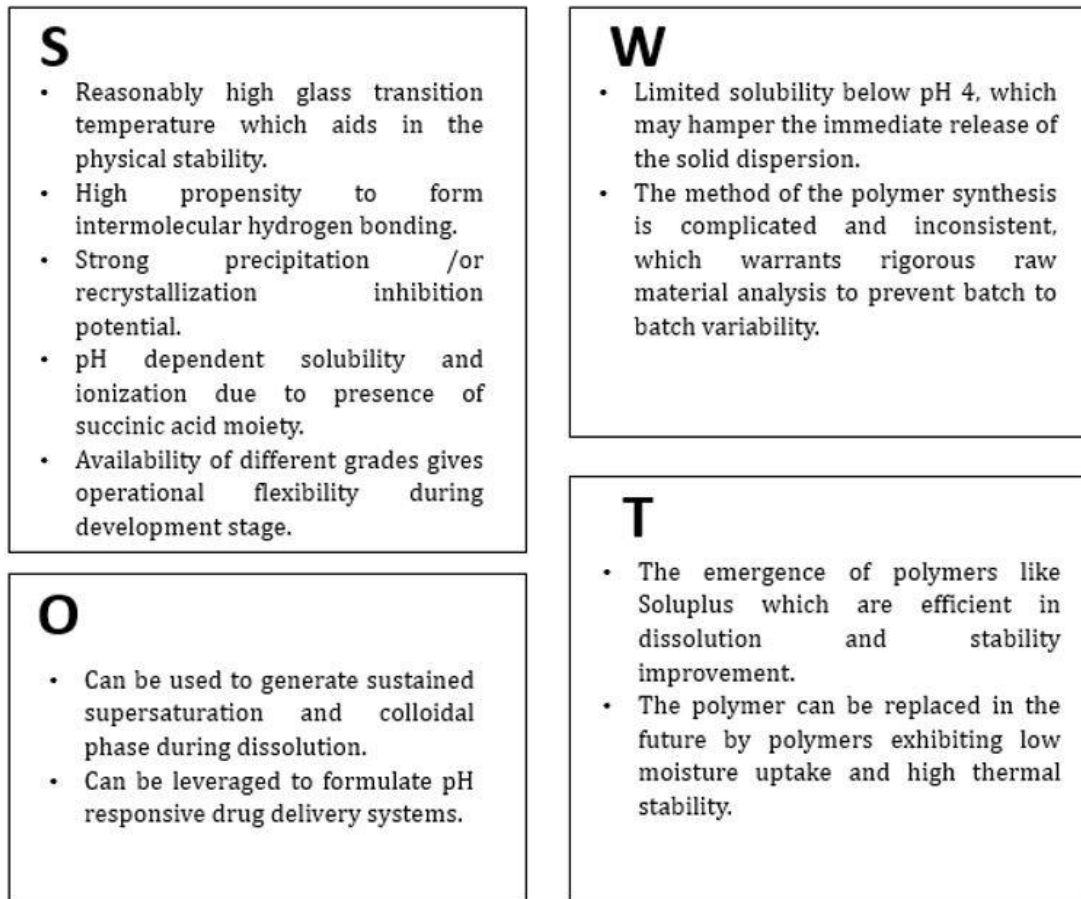

Figure 10: SWOT analysis of HPMCAS with regard to its implementation in solid dispersions.

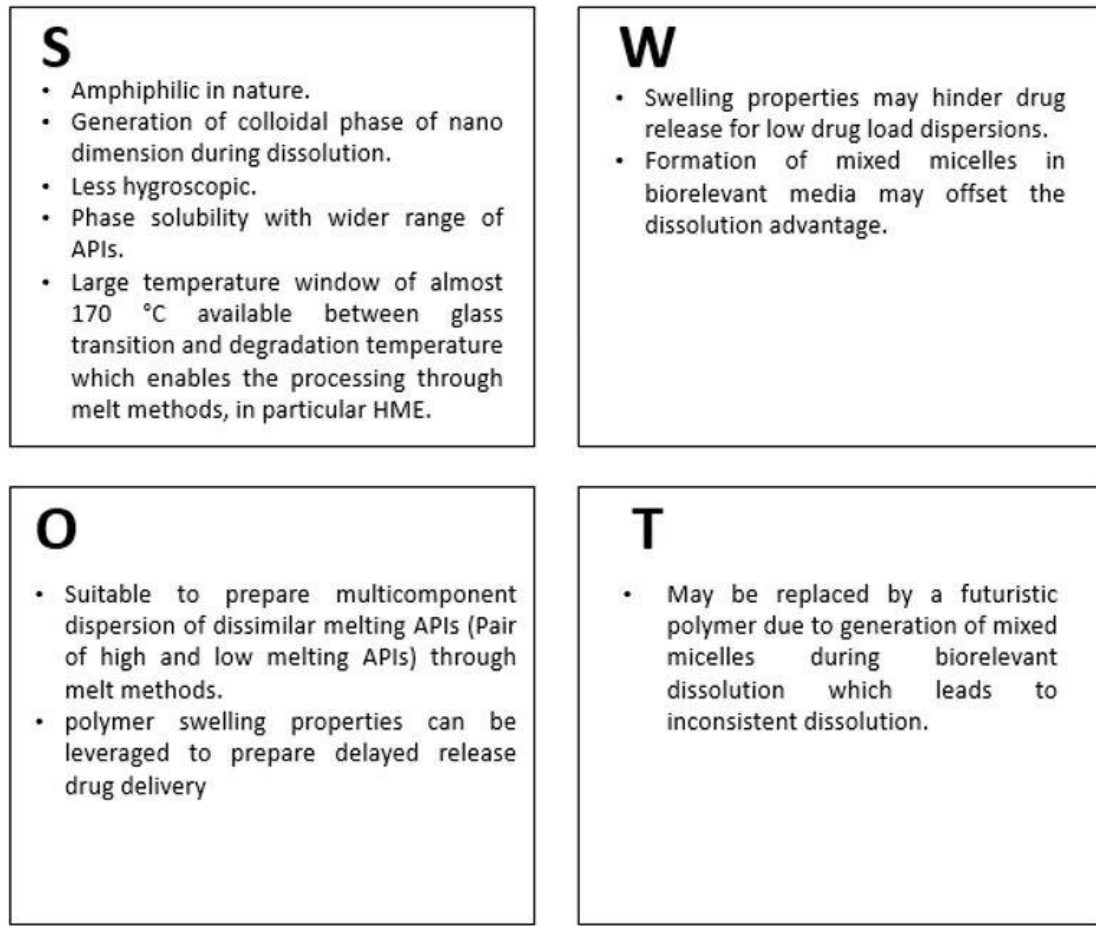

Figure 11: SWOT analysis of Soluplus® with regard to its implementation in solid dispersions.

### **Fikentscher's k-value:**

The K-values assigned to various grades of PVP polymer represents a function of the average molecular weight, the degree of polymerization, and the intrinsic viscosity. The K-values are derived from viscosity measurements and are calculated according to Fikentscher's formula. As a measure of the mean molecular weight of a polymeric substance, Fikentscher derived the k value from measurements of the relative viscosity of solutions of polymer solutions. The k value is calculated by applying the following equation:

$$\frac{\eta_c}{\eta_0} = \left( \frac{75 * k^2}{1 + 1.5 * k * c} + k \right) * c$$

Where:

- c = concentration in g/100 ml.
- $\eta_c$  = viscosity of the solution.

*Supplementary material*

$\eta_0$  = viscosity of the solvent.

k = value according to Fikentscher ( $K = 1000 \cdot k$ )
